# Supplementary material for: Glyphosate and AMPA in Human Urine of HBM4EU Aligned Studies: Part A Children
Source: MDPI journal article supplement (doi:10.3390/toxics10080470), 2022-08-12
Supplement: s1 [file s1]

## Supplementary Materials

*Table S1. Logistic regression for urinary concentrations of glyphosate by some potential exposure determinants, subgroups of the participants stratified for individual characteristics, dietary preferences, exposure relevant behaviour and sociodemographic information.*

| Determinant                   |                                              | SLO_CRP children  |        |         | ORGANIKO          |       |         | GerES V-sub |        |         | 3XG               |       |         | ESTEBAN |        |         | Combined data* |        |         |
|-------------------------------|----------------------------------------------|-------------------|--------|---------|-------------------|-------|---------|-------------|--------|---------|-------------------|-------|---------|---------|--------|---------|----------------|--------|---------|
|                               |                                              | N                 | Beta   | p value | N                 | Beta  | p value | N           | Beta   | p value | N                 | Beta  | p value | N       | Beta   | p value | N              | Beta   | p value |
| Sex                           | Female                                       | 82                | 0      |         | 76                | 0     |         | 150         | 0      |         | 67                | 0     |         | 115     | 0      |         | 490            | 0      |         |
|                               | Male                                         | 67                | 0.03   | 0.939   | 82                | -0.19 | 0.576   | 150         | -0.24  | 0.324   | 66                | 0.18  | 0.641   | 108     | 0.101  | 0.779   | 473            | -0.08  | 0.541   |
| Age in years                  |                                              | 149               | -0.09  | 0.609   | 158               | -0.02 | 0.951   | 300         | -0.07  | 0.302   | 133               | 1.03  | 0.015   | 223     | 0.178  | 0.165   | 963            | -0.01  | 0.854   |
| Nuts 1                        | all same category                            |                   |        |         | All same category |       |         | 300         |        | 0.469   | All same category |       |         | 223     |        | 0.621   | 963            |        | <0.001  |
| Nuts 2                        | all same category                            |                   |        |         | All same category |       |         |             |        |         | All same category |       |         | 223     |        | 0.922   | 300            |        | <0.001  |
| Nuts 3                        | all same category                            |                   |        |         | All same category |       |         |             |        |         |                   |       |         | 223     |        | 1       | 433            |        | 1       |
| DEGURBA                       | Densely populated area (cities)              |                   |        |         |                   |       |         | 65          | 0      |         |                   |       |         | 52      | 0      |         | 117            | 0      |         |
|                               | Intermediate density area (towns or suburbs) |                   |        |         |                   |       |         | 132         | -0.07  | 0.824   | All same category |       |         | 67      | 0.652  | 0.173   | 332            | 0.122  | 0.643   |
|                               | Thinly populated area (rural area)           | all same category |        |         |                   |       |         | 103         | -2.97  | 0.374   |                   |       |         | 104     | -0.239 | 0.626   | 356            | -0.296 | 0.271   |
| Sampling season               | Spring                                       |                   |        |         |                   |       |         | 109         | 0      |         | 21                | 0     |         | 55      | 0      |         | 185            | 0      |         |
|                               | Summer                                       |                   |        |         |                   |       |         | 37          | -0.52  | 0.191   | 41                | -0.69 | 0.251   | 42      | -0.340 | 0.576   | 120            | -0.512 | 0.063   |
|                               | Fall                                         |                   |        |         |                   |       |         | 70          | -0.007 | 0.984   | 25                | 0.25  | 0.715   | 51      | 0.378  | 0.454   | 146            | 0.096  | 0.697   |
|                               | Winter                                       | all same category |        |         | All same category |       |         | 84          | -0.05  | 0.883   | 46                | -0.43 | 0.467   | 75      | 0.102  | 0.832   | 512            | -0.139 | 0.546   |
| Use of pesticide outdoor      | No                                           | 76                | 0      |         | 124               | 0     |         |             |        |         | 126               | 0     |         | 97      | 0      |         | 423            | 0      |         |
|                               | Yes                                          | 73                | 0.86   | 0.034   | 33                | -0.21 | 0.614   |             |        |         | 5                 | 0.6   | 0.534   | 80      | -0.03  | 0.950   | 191            | 0.256  | 0.260   |
| Frequency consumption of eggs | 0 = Never                                    | 3                 | 0      |         | 6                 | 0     |         | 18          | 0      |         | 3                 | 0     |         | 7       | 0      |         | 37             | 0      |         |
|                               | Rarely: <1 time / month                      | 1                 | -20.17 | 1       | 1                 | -20.1 | 1       |             |        |         | 50                | -0.71 | 0.587   | 10      | -19.41 | 0.999   | 62             | -0.304 | 0.556   |

| Determinant                         |                                                 | SLO_CRP children |       |         | ORGANIKO |        |         | GerES V-sub |       |         | 3XG |       |         | ESTEBAN |        |         | Combined data* |        |         |
|-------------------------------------|-------------------------------------------------|------------------|-------|---------|----------|--------|---------|-------------|-------|---------|-----|-------|---------|---------|--------|---------|----------------|--------|---------|
|                                     |                                                 | N                | Beta  | p value | N        | Beta   | p value | N           | Beta  | p value | N   | Beta  | p value | N       | Beta   | p value | N              | Beta   | p value |
|                                     | Sometimes: <= 1 time / week but >= 1 time/month | 52               | -0.96 | 0.458   | 18       | 1.15   | 0.354   | 250         | -0.02 | 0.963   |     |       |         | 159     | 0.23   | 0.836   | 479            | 0.054  | 0.889   |
|                                     | Often: 2-3 times / week                         | 67               | -0.73 | 0.571   | 71       | 1.32   | 0.25    | 20          | -0.22 | 0.744   | 79  | -0.48 | 0.714   | 33      | 0.67   | 0.559   | 270            | 0.156  | 0.702   |
|                                     | Very Often: 4-6 times / week                    | 20               | -0.2  | 0.879   | 26       | 1.45   | 0.216   | 3           | 0.32  | 0.807   |     |       |         | 2       | -19.46 | 0.999   | 51             | 0.485  | 0.328   |
|                                     | Everyday: >= 7 times / week                     | 6                | -20.7 | 0.999   | 4        | 0.97   | 0.538   | 5           | -0.82 | 0.459   |     |       |         |         |        |         | 15             | -0.747 | 0.315   |
| Frequency consumption of fruit      | 0 = Never                                       | 2                | 0     |         | 1        | 0      |         | 2           | 0     |         | 1   | 0     |         | 2       | 0      |         | 8              | 0      |         |
|                                     | Rarely: <1 time / month                         | 1                | 42.3  | 0.999   |          |        |         |             |       |         |     |       |         | 2       | -21.27 | 0.999   | 3              | 1.46   | 0.336   |
|                                     | Sometimes: <= 1 time / week but >= 1 time/month | 6                | -0.23 | 1       | 6        | -20.32 | 1       | 35          | 21.63 | 0.999   |     |       |         | 10      | -0.88  | 0.579   | 57             | 0.66   | 0.471   |
|                                     | Often: 2-3 times / week                         | 21               | 20.41 | 0.999   | 27       | -20.22 | 1       | 38          | 21.36 | 0.999   | 3   | 21.67 | 1       | 38      | -3.67  | 0.036   | 127            | 0.53   | 0.553   |
|                                     | Very Often: 4-6 times / week                    | 38               | 19.76 | 0.999   | 18       | -21.75 | 1       | 33          | 22.13 | 0.999   | 16  | 21.19 | 1       | 60      | -1.29  | 0.377   | 165            | 0.70   | 0.432   |
|                                     | Everyday: >= 7 times / week                     | 81               | 20.29 | 0.999   | 74       | -20.98 | 1       | 189         | 21.56 | 0.999   | 113 | 21.02 | 1       | 98      | -1.52  | 0.292   | 555            | 0.65   | 0.454   |
| Frequency consumption of vegetables | 0 = Never                                       |                  |       |         | 9        | 0      |         | 7           | 0     |         |     |       |         | 2       | 0      |         | 18             | 0      |         |
|                                     | Rarely: <1 time / month                         |                  |       |         |          |        |         |             |       |         |     |       |         | 2       | -21.27 | 0.999   | 2              | -19.76 | 0.999   |
|                                     | Sometimes: <= 1 time / week but >= 1 time/month | 1                | 0     |         | 117      | -0.24  | 0.744   | 84          | 0.05  | 0.949   |     |       |         | 10      | -0.88  | 0.579   | 212            | -0.24  | 0.653   |

| Determinant                         |                                                 | SLO_CRP children |       |         | ORGANIKO |      |         | GerES V-sub |        |         | 3XG |       |         | ESTEBAN |       |         | Combined data* |       |         |
|-------------------------------------|-------------------------------------------------|------------------|-------|---------|----------|------|---------|-------------|--------|---------|-----|-------|---------|---------|-------|---------|----------------|-------|---------|
|                                     |                                                 | N                | Beta  | p value | N        | Beta | p value | N           | Beta   | p value | N   | Beta  | p value | N       | Beta  | p value | N              | Beta  | p value |
|                                     | Often: 2-3 times / week                         | 8                | 20.54 | 1       |          |      |         | 69          | 0.09   | 0.921   | 7   | 0     |         | 38      | -3.67 | 0.036   | 122            | -0.43 | 0.450   |
|                                     | Very Often: 4-6 times / week                    | 14               | 20.63 | 1       |          |      |         | 44          | -0.04  | 0.964   | 27  | -0.65 | 0.526   | 60      | -1.29 | 0.377   | 145            | -0.13 | 0.824   |
|                                     | Everyday : >= 7 times / week                    | 126              | 20.25 | 1       |          |      |         | 93          | 0.11   | 0.895   | 99  | -1.04 | 0.282   | 98      | -1.52 | 0.292   | 416            | -0.27 | 0.626   |
| Frequency consumption of cereals    | 0 = Never                                       |                  |       |         |          |      |         | 1           | 0      |         |     |       |         | 3       | 0     |         | 4              | 0     |         |
|                                     | Rarely: <1 time / month                         |                  |       |         |          |      |         |             |        |         |     |       |         |         |       |         | 160            | 0.42  | 0.729   |
|                                     | Sometimes: <= 1 time / week but >= 1 time/month | 3                | 0     |         |          |      |         | 135         | -20.95 | 1       |     |       |         | 22      | 19.74 | 0.999   | 214            | 0.13  | 0.914   |
|                                     | Often: 2-3 times / week                         | 30               | 20    | 0.999   |          |      |         | 75          | -21.31 | 1       | 1   | 0     |         | 108     | 19.57 | 0.999   | 162            | 0.39  | 0.747   |
|                                     | Very Often: 4-6 times / week                    | 63               | 19.84 | 0.999   |          |      |         | 28          | -20.73 | 1       | 6   | 21.31 | 1       | 65      | 19.79 | 0.999   | 251            | 0.33  | 0.788   |
|                                     | Everyday : >= 7 times / week                    | 53               | 19.96 | 0.999   |          |      |         | 59          | -21.22 | 1       | 126 | 21.43 | 1       | 13      | 20.08 | 0.999   |                |       |         |
| Frequency consumption of local food | 0 = Never                                       | 2                | 0     |         |          |      |         |             |        |         | 48  | 0     |         |         |       |         | 50             | 0     |         |
|                                     | Rarely: <1 time / month                         |                  |       |         |          |      |         |             |        |         | 25  | 0.02  | 0.969   |         |       |         | 25             | 0.03  | 0.949   |
|                                     | Sometimes: <= 1 time / week but >= 1 time/month |                  |       |         |          |      |         |             |        |         | 29  | 0.41  | 0.438   |         |       |         | 29             | 0.36  | 0.478   |
|                                     | Often: 2-3 times / week                         | 9                | 19.27 | 0.999   |          |      |         |             |        |         | 15  | 0.32  | 0.634   |         |       |         | 24             | 0.01  | 0.981   |
|                                     | Very Often: 4-6 times / week                    | 14               | 20.25 | 0.999   |          |      |         |             |        |         |     |       |         |         |       |         | 14             | -0.05 | 0.948   |

| Determinant                           |                                                         | SLO_CRP children  |        |         | ORGANIKO |      |         | GerES V-sub       |      |         | 3XG |       |         | ESTEBAN                                                                |        |         | Combined data* |        |         |
|---------------------------------------|---------------------------------------------------------|-------------------|--------|---------|----------|------|---------|-------------------|------|---------|-----|-------|---------|------------------------------------------------------------------------|--------|---------|----------------|--------|---------|
|                                       |                                                         | N                 | Beta   | p value | N        | Beta | p value | N                 | Beta | p value | N   | Beta  | p value | N                                                                      | Beta   | p value | N              | Beta   | p value |
|                                       | Everyday : $\geq 7$ times / week                        | 124               | 20.13  | 0.999   |          |      |         |                   |      |         | 16  | -0.69 | 0.277   |                                                                        |        |         | 140            | -0.22  | 0.669   |
| Frequency consumption of organic food | 0 = Never                                               |                   |        |         |          |      |         |                   |      |         |     |       |         |                                                                        |        |         |                |        |         |
|                                       | Rarely: $< 1$ time / month                              |                   |        |         |          |      |         |                   |      |         |     |       |         | 65                                                                     | 0      |         | 65             | 0      |         |
|                                       | Sometimes: $\leq 1$ time / week but $\geq 1$ time/month |                   |        |         |          |      |         |                   |      |         |     |       |         | 36                                                                     | -0.13  | 0.803   | 36             | -0.13  | 0.803   |
|                                       | Often: 2-3 times / week                                 |                   |        |         |          |      |         |                   |      |         |     |       |         | 27                                                                     | -2.03  | 0.059   | 27             | -2.03  | 0.059   |
|                                       | Very Often: 4-6 times / week                            |                   |        |         |          |      |         |                   |      |         |     |       |         | 22                                                                     | -0.61  | 0.391   | 22             | -0.61  | 0.391   |
|                                       | Everyday : $\geq 7$ times / week                        |                   |        |         |          |      |         |                   |      |         |     |       |         | 61                                                                     | -0.51  | 0.295   | 61             | -0.51  | 0.295   |
| Vegetarian                            | No                                                      | all same category |        |         |          |      |         | 283               | 0    |         | 80  | 0     |         | All same category for for available data (those who answered question) |        |         | 530            | 0      |         |
|                                       | Yes                                                     |                   |        |         |          |      |         | 13                | 0.65 | 0.303   | 2   | -0.41 | 0.785   |                                                                        |        |         | 15             | 0.524  | 0.362   |
| Type of drinking water most consumed  | Bottled water                                           | 25                | 0      |         |          |      |         |                   |      |         |     |       |         | 51                                                                     | 0      |         | 76             | 0      |         |
|                                       | Tap water                                               | 120               | -0.88  | 0.073   |          |      |         |                   |      |         |     |       |         | 132                                                                    | -0.272 | 0.562   | 252            | -0.16  | 0.619   |
|                                       | Ground water                                            | 4                 | -20.68 | 0.999   |          |      |         |                   |      |         |     |       |         | 8                                                                      | -0.112 | 0.922   | 12             | -1.10  | 0.310   |
|                                       | Other                                                   |                   |        |         |          |      |         |                   |      |         |     |       |         | 24                                                                     | 0.506  | 0.438   | 24             | 0.12   | 0.841   |
| Tap water source at home              | Public                                                  | 144               | 0      | 1       |          |      |         | all same category |      |         | 63  | 0     |         |                                                                        |        |         | 499            | 0      |         |
|                                       | Private well                                            | 4                 | -19.95 | 0.999   |          |      |         |                   |      |         |     |       |         |                                                                        |        |         | 4              | -19.76 | 0.999   |

| Determinant                                |                                                 | SLO_CRP children  |        |         | ORGANIKO          |      |         | GerES V-sub                          |       |         | 3XG |        |         | ESTEBAN                                                            |        |         | Combined data* |       |         |
|--------------------------------------------|-------------------------------------------------|-------------------|--------|---------|-------------------|------|---------|--------------------------------------|-------|---------|-----|--------|---------|--------------------------------------------------------------------|--------|---------|----------------|-------|---------|
|                                            |                                                 | N                 | Beta   | p value | N                 | Beta | p value | N                                    | Beta  | p value | N   | Beta   | p value | N                                                                  | Beta   | p value | N              | Beta  | p value |
|                                            | Both public and private well                    | 1                 | -19.79 | 1       |                   |      |         |                                      |       |         | 57  | -0.49  | 0.212   |                                                                    |        |         | 58             | -0.52 | 0.178   |
| Frequency of consumption of tea and coffee | 0 = Never                                       | 138               | 0      |         |                   |      |         | 65                                   | 0     |         |     |        |         | 122                                                                | 0      |         | 325            | 0     |         |
|                                            | Rarely: <1 time / month                         | 2                 | 22.49  | 0.999   |                   |      |         |                                      |       |         |     |        |         | 22                                                                 | -1.02  | 0.191   | 24             | -0.01 | 0.993   |
|                                            | Sometimes: <= 1 time / week but >= 1 time/month | 4                 | 1.26   | 0.222   |                   |      |         | 133                                  | 0.08  | 0.799   |     |        |         | 42                                                                 | -0.70  | 0.182   | 179            | -0.08 | 0.728   |
|                                            | Often: 2-3 times / week                         | 3                 | -19.9  | 0.999   |                   |      |         | 31                                   | -0.32 | 0.498   |     |        |         | 13                                                                 | -0.42  | 0.600   | 47             | -0.46 | 0.234   |
|                                            | Very Often: 4-6 times / week                    | 1                 | -20.11 | 1       |                   |      |         | 10                                   | 0.01  | 0.987   |     |        |         | 2                                                                  | -19.93 | 0.999   | 13             | -0.34 | 0.592   |
|                                            | Everyday: >= 7 times / week                     | 1                 | -20.19 | 1       |                   |      |         | 59                                   | 0.16  | 0.676   |     |        |         | 10                                                                 | -0.90  | 0.404   | 70             | -0.09 | 0.767   |
| Are there pets in home                     | No                                              | 115               | 0      |         |                   |      |         | 172                                  | 0     |         | 80  | 0      |         | 79                                                                 | 0      |         | 446            | 0     |         |
|                                            | Yes                                             | 34                | 0.17   | 0.709   |                   |      |         | 128                                  | -0.12 | 0.628   | 53  | 1.06   | 0.01    | 136                                                                | 0.17   | 0.660   | 351            | 0.235 | 0.164   |
| Proximity to agricultural fields           | >1000 m                                         |                   |        |         |                   |      |         |                                      |       |         |     |        |         |                                                                    |        |         |                |       |         |
|                                            | Between 150 and 1000 m                          | all same category |        |         |                   |      |         |                                      |       |         |     |        |         |                                                                    |        |         | 149            | 0     |         |
|                                            | < 150 m                                         |                   |        |         |                   |      |         | All same category for available data |       |         |     |        |         | All same category for available data (those who answered question) |        |         | 166            | -0.57 | 0.121   |
| Income by household**                      | Low                                             | 12                | 0      |         |                   |      |         |                                      |       |         | 1   | 0      |         | 10                                                                 | 0      |         | 23             | 0     |         |
|                                            | Medium                                          | 72                | -0.49  | 0.486   |                   |      |         |                                      |       |         | 14  | -19.18 | 1       | 78                                                                 | 0.20   | 0.811   | 164            | -0.28 | 0.583   |
|                                            | High                                            | 48                | -0.46  | 0.52    | All same category |      |         |                                      |       |         | 116 | -19.05 | 1       | 121                                                                | -0.65  | 0.439   | 285            | -0.59 | 0.251   |

| Determinant                 |                                   | SLO_CRP children |      |         | ORGANIKO |      |         | GerES V-sub |      |         | 3XG |        |         | ESTEBAN |       |         | Combined data* |      |         |
|-----------------------------|-----------------------------------|------------------|------|---------|----------|------|---------|-------------|------|---------|-----|--------|---------|---------|-------|---------|----------------|------|---------|
|                             |                                   | N                | Beta | p value | N        | Beta | p value | N           | Beta | p value | N   | Beta   | p value | N       | Beta  | p value | N              | Beta | p value |
|                             | Don't know or don't want to share |                  |      |         |          |      |         |             |      |         | 1   | 2.55   | 1       | 14      | 0.48  | 0.626   | 15             | 0.36 | 0.636   |
| Highest education household | ISCED 0-2                         | 10               | 0    |         |          |      |         | 15          | 0    |         | 1   | 0      |         | 10      | 0     |         | 36             | 0    |         |
|                             | ISCED 3-4                         | 39               | 0.92 | 0.422   |          |      |         | 116         | 0.58 | 0.314   | 19  | -19.94 | 1       | 76      | -0.17 | 0.839   | 250            | 0.46 | 0.282   |
|                             | ISCED≥5                           | 100              | 1.19 | 0.276   |          |      |         | 169         | 0.43 | 0.444   | 111 | -20.72 | 1       | 136     | -0.19 | 0.821   | 673            | 0.32 | 0.434   |

p values mentioned are pairwise p values except for age which was not categorical but continuous

Covariates forced into the model were creatinine, BMI, matrix (morning & spot urine); for combined studies also country was forced into the model.

OR= exp (Beta)

\*: LOQ set at 0.1 µg/L

\*\*: Country specific

Note that if a trend was observed in the data and the distribution of participants was unequal over different categories or the number of participants was small for certain categories, a combination of categories was taken. Here results are displayed as observed in the original questionnaire.

Not all studied exposure determinants are listed in the table above; Most relevant were chosen.

*Table S2. Logistic regression for urinary concentrations of AMPA by some potential exposure determinants, subgroups of the participants stratified for individual characteristics, dietary preferences, exposure relevant behaviour and sociodemographic information.*

| Determinant                   |                                                 | SLO_CRP children  |       |         | ORGANIKO          |       |         | GerES V-sub |       |         | 3XG               |        |         | ESTEBAN |        |         | Combined data* |       |         |
|-------------------------------|-------------------------------------------------|-------------------|-------|---------|-------------------|-------|---------|-------------|-------|---------|-------------------|--------|---------|---------|--------|---------|----------------|-------|---------|
|                               |                                                 | N                 | Beta  | p value | N                 | Beta  | p value | N           | Beta  | p value | N                 | Beta   | p value | N       | Beta   | p value | N              | Beta  | p value |
| Sex                           | Female                                          | 82                | 0     |         | 76                | 0     |         | 150         |       |         | 67                | 0      |         | 115     | 0      |         | 423            | 0     |         |
|                               | Male                                            | 67                | 0.55  | 0.118   | 82                | -0.32 | 0.416   | 150         | -0.19 | 0.436   | 66                | -0.17  | 0.692   | 108     | -0.09  | 0.885   | 407            | -0.12 | 0.441   |
| Age in years                  |                                                 | 149               | -0.05 | 0.777   | 158               | 0.03  | 0.934   | 300         | -0.06 | 0.423   | 133               | 0.67   | 0.181   | 223     | -0.01  | 0.994   | 830            | -0.05 | 0.362   |
| Nuts 1                        |                                                 | all same category |       |         | All same category |       |         | 300         |       | 0.672   | All same category |        |         | 223     |        | 0.996   | 830            |       | <0.001  |
| Nuts 2                        |                                                 | all same category |       |         | All same category |       |         |             |       |         | All same category |        |         | 223     |        | 1       | 277            |       | <0.001  |
| Nuts 3                        |                                                 | all same category |       |         | All same category |       |         |             |       |         |                   |        |         | 223     |        | 1       | 303            |       | 0.754   |
| DEGURBA                       | Densely populated area (cities)                 |                   |       |         |                   |       |         | 65          | 0     |         |                   |        |         | 52      | 0      |         | 117            | 0     |         |
|                               | Intermediate density area (towns or suburbs)    |                   |       |         |                   |       |         | 132         | 0.26  | 0.408   | All same category |        |         | 67      | -0.41  | 0.640   | 199            | 0.06  | 0.81    |
|                               | Thinly populated area (rural area)              | all same category |       |         |                   |       |         | 103         | -0.34 | 0.304   |                   |        |         | 104     | -0.07  | 0.939   | 356            | -0.33 | 0.201   |
| Sampling season               | Spring                                          |                   |       |         |                   |       |         | 109         | 0     |         | 21                | 0      |         | 55      | 0      |         | 164            | 0     |         |
|                               | Summer                                          |                   |       |         |                   |       |         | 37          | -0.3  | 0.932   | 41                | -0.58  | 0.415   | 42      | -17.99 | 0.997   | 79             | -0.4  | 0.199   |
|                               | Fall                                            |                   |       |         |                   |       |         | 70          | -0.66 | 0.047   | 25                | 0.64   | 0.373   | 51      | -18.34 | 0.997   | 121            | -0.65 | 0.015   |
|                               | Winter                                          | all same category |       |         | All same category |       |         | 84          | 0.11  | 0.708   | 46                | 0.04   | 0.947   | 75      | -18.39 | 0.997   | 466            | -0.15 | 0.555   |
| Use of pesticide outdoor      | No                                              | 76                | 0     |         | 124               | 0     |         |             |       |         | 126               | 0      |         | 97      | 0      |         | 297            | 0     |         |
|                               | Yes                                             | 73                | 0.344 | 0.322   | 33                | -0.57 | 0.2     |             |       |         | 5                 | -20.66 | 0.999   | 80      | -0.07  | 0.930   | 186            | 0.02  | 0.911   |
| Frequency consumption of eggs | 0 = Never                                       | 3                 | 0     |         | 6                 | 0     |         | 18          | 0     |         | 3                 | 0      |         | 7       | 0      |         | 34             | 0     |         |
|                               | Rarely: <1 time / month                         | 1                 | -19.9 | 1       | 1                 | 20.57 | 1       |             |       |         | 50                | 20.02  | 0.999   | 10      | 19.70  | 0.999   | 12             | 2.17  | 0.065   |
|                               | Sometimes: <= 1 time / week but >= 1 time/month | 52                | 0.14  | 0.915   | 18                | 0.85  | 0.419   | 250         | 0.5   | 0.344   |                   |        |         | 159     | 1.11   | 0.340   | 479            | 0.42  | 0.27    |

| Determinant                         |                                                 | SLO_CRP children |        |         | ORGANIKO |        |         | GerES V-sub |       |         | 3XG |       |         | ESTEBAN |       |         | Combined data* |       |         |
|-------------------------------------|-------------------------------------------------|------------------|--------|---------|----------|--------|---------|-------------|-------|---------|-----|-------|---------|---------|-------|---------|----------------|-------|---------|
|                                     |                                                 | N                | Beta   | p value | N        | Beta   | p value | N           | Beta  | p value | N   | Beta  | p value | N       | Beta  | p value | N              | Beta  | p value |
|                                     | Often: 2-3 times / week                         | 67               | -0.1   | 0.936   | 71       | 0.81   | 0.368   | 20          | -0.13 | 0.853   | 79  | 19.63 | 0.999   | 33      | 1.73  | 0.248   | 191            | 0.31  | 0.449   |
|                                     | Very Often: 4-6 times / week                    | 20               | 0.22   | 0.868   | 26       | 1.09   | 0.27    | 3           | -0.31 | 0.817   |     |       |         | 2       | 19.32 | 0.999   | 51             | 0.49  | 0.324   |
|                                     | Everyday : >= 7 times / week                    | 6                | 0.38   | 0.798   | 4        | 0.49   | 0.741   | 5           | -0.14 | 0.903   |     |       |         |         |       |         | 15             | 0.25  | 0.714   |
| Frequency consumption of fruit      | 0 = Never                                       | 2                | 0      |         | 1        | 0      |         | 2           | 0     |         | 1   | 0     |         | 2       | 0     |         | 7              | 0     |         |
|                                     | Rarely: <1 time / month                         | 1                | 42.23  | 0.999   |          |        |         |             |       |         |     |       |         | 2       | 20.99 | 0.999   | 3              | 21.99 | 0.999   |
|                                     | Sometimes: <= 1 time / week but >= 1 time/month | 6                | 21.66  | 0.999   | 6        | -21.08 | 1       | 35          | -0.21 | 0.882   |     |       |         | 10      | 2.52  | 0.168   | 57             | 1.07  | 0.252   |
|                                     | Often: 2-3 times / week                         | 21               | 21.81  | 0.999   | 27       | -19.35 | 1       | 38          | -0.51 | 0.729   | 6   | 0.36  | 1       | 38      | 3.80  | 0.033   | 124            | 1.45  | 0.108   |
|                                     | Very Often: 4-6 times / week                    | 38               | 21.13  | 0.999   | 18       | -19.26 | 1       | 33          | -0.02 | 0.991   | 16  | 18.74 | 1       | 60      | 3.79  | 0.021   | 149            | 1.61  | 0.074   |
|                                     | Everyday : >= 7 times / week                    | 81               | 21.08  | 0.999   | 74       | -19.37 | 1       | 189         | 0.09  | 0.946   | 113 | 19.62 | 1       | 98      | 3.16  | 0.037   | 442            | 1.45  | 0.103   |
| Frequency consumption of vegetables | 0 = Never                                       |                  |        |         | 9        | 0      |         | 7           | 0     |         |     |       |         | 2       | 0     |         | 18             | 0     |         |
|                                     | Rarely: <1 time / month                         |                  |        |         |          |        |         |             |       |         |     |       |         | 2       | 20.99 | 0.999   | 2              | 20.46 | 0.999   |
|                                     | Sometimes: <= 1 time / week but >= 1 time/month | 1                | 0      |         | 117      | -0.63  | 0.479   | 84          | 0.36  | 0.674   |     |       |         | 10      | 2.52  | 0.168   | 212            | 0.27  | 0.62    |
|                                     | Often: 2-3 times / week                         | 8                | -20.97 | 1       |          |        |         | 69          | 0.59  | 0.499   | 7   | 0     |         | 38      | 3.80  | 0.033   | 115            | 0.6   | 0.303   |
|                                     | Very Often: 4-6 times / week                    | 14               | -21.35 | 1       |          |        |         | 44          | 0.07  | 0.932   | 27  | 20.16 | 0.999   | 60      | 3.79  | 0.021   | 118            | 0.44  | 0.453   |





| Determinant                                |                                                 | SLO_CRP children  |       |         | ORGANIKO |      |         | GerES V-sub       |      |         | 3XG |        |         | ESTEBAN                                                                |       |         | Combined data*              |       |         |
|--------------------------------------------|-------------------------------------------------|-------------------|-------|---------|----------|------|---------|-------------------|------|---------|-----|--------|---------|------------------------------------------------------------------------|-------|---------|-----------------------------|-------|---------|
|                                            |                                                 | N                 | Beta  | p value | N        | Beta | p value | N                 | Beta | p value | N   | Beta   | p value | N                                                                      | Beta  | p value | N                           | Beta  | p value |
|                                            | Rarely: <1 time / month                         |                   |       |         |          |      |         |                   |      |         |     |        |         | 65                                                                     | 0     |         | Only data ESTEBAN available |       |         |
|                                            | Sometimes: <= 1 time / week but >= 1 time/month |                   |       |         |          |      |         |                   |      |         |     |        |         | 36                                                                     | 18.14 | 0.998   |                             |       |         |
|                                            | Often: 2-3 times / week                         |                   |       |         |          |      |         |                   |      |         |     |        |         | 27                                                                     | 0.39  | 0.744   |                             |       |         |
|                                            | Very Often: 4-6 times / week                    |                   |       |         |          |      |         |                   |      |         |     |        |         | 22                                                                     | 0.36  | 0.764   |                             |       |         |
|                                            | Everyday : >= 7 times / week                    |                   |       |         |          |      |         |                   |      |         |     |        |         | 61                                                                     | -0.42 | 0.579   |                             |       |         |
| Vegetarian                                 | No                                              | all same category |       |         |          |      |         | 283               | 0    |         | 80  | 0      |         | All same category for for available data (those who answered question) |       |         | 450                         | 0     |         |
|                                            | Yes                                             |                   |       |         |          |      |         | 13                | 0.62 | 0.305   | 2   | -19.99 | 0.999   |                                                                        |       |         | 13                          | 0.65  | 0.282   |
| Type of drinking water most consumed       | Bottled water                                   | 25                | 0     |         |          |      |         |                   |      |         |     |        |         | 51                                                                     | 0     |         | 76                          | 0     |         |
|                                            | Tap water                                       | 120               | -0.18 | 0.703   |          |      |         |                   |      |         |     |        |         | 132                                                                    | -0.93 | 0.393   | 252                         | -0.27 | 0.377   |
|                                            | Ground water                                    | 4                 | 1.38  | 0.264   |          |      |         |                   |      |         |     |        |         | 8                                                                      | -3.11 | 0.021   | 12                          | -0.55 | 0.43    |
|                                            | Other                                           |                   |       |         |          |      |         |                   |      |         |     |        |         | 24                                                                     | -0.94 | 0.518   | 24                          | 0.33  | 0.636   |
| Tap water source at home                   | Public                                          | 144               | 0     |         |          |      |         | all same category |      |         | 63  | 0      |         |                                                                        |       |         | 436                         | 0     |         |
|                                            | Private well                                    | 4                 | 0.52  | 0.627   |          |      |         |                   |      |         |     |        |         |                                                                        |       |         | 4                           | 0.47  | 0.649   |
|                                            | Both public and private well                    | 1                 | 22.04 | 1       |          |      |         |                   |      |         | 57  | -0.66  | 0.159   |                                                                        |       |         | 1                           | 21.98 | 1       |
| Frequency of consumption of tea and coffee | 0 = Never                                       | 138               | 0     |         |          |      |         | 65                | 0    |         |     |        |         | 122                                                                    | 0     |         | 325                         | 0     |         |
|                                            | Rarely: <1 time / month                         | 2                 | 0.21  | 0.888   |          |      |         |                   |      |         |     |        |         | 22                                                                     | -1.57 | 0.060   | 24                          | -0.59 | 0.212   |

| Determinant                      |                                                 | SLO_CRP children  |        |         | ORGANIKO          |      |         | GerES V-sub                          |       |         | 3XG |       |         | ESTEBAN                                                      |        |         | Combined data* |       |         |
|----------------------------------|-------------------------------------------------|-------------------|--------|---------|-------------------|------|---------|--------------------------------------|-------|---------|-----|-------|---------|--------------------------------------------------------------|--------|---------|----------------|-------|---------|
|                                  |                                                 | N                 | Beta   | p value | N                 | Beta | p value | N                                    | Beta  | p value | N   | Beta  | p value | N                                                            | Beta   | p value | N              | Beta  | p value |
|                                  | Sometimes: <= 1 time / week but >= 1 time/month | 4                 | 1.36   | 0.253   |                   |      |         | 133                                  | 0.01  | 0.993   |     |       |         | 42                                                           | -17.80 | 0.998   | 179            | 0.15  | 0.539   |
|                                  | Often: 2-3 times / week                         | 3                 | -0.36  | 0.79    |                   |      |         | 31                                   | -0.97 | 0.053   |     |       |         | 13                                                           | -1.80  | 0.060   | 47             | -0.54 | 0.139   |
|                                  | Very Often: 4-6 times / week                    | 1                 | -21.19 | 1       |                   |      |         | 10                                   | -1.34 | 0.114   |     |       |         | 2                                                            | 17.91  | 0.999   | 13             | -1.87 | 0.021   |
|                                  | Everyday : >= 7 times / week                    | 1                 | -21.01 | 1       |                   |      |         | 59                                   | -0.2  | 0.954   |     |       |         | 10                                                           | -0.91  | 0.442   | 70             | 0.05  | 0.868   |
| Are there pets in home           | No                                              | 115               | 0      |         |                   |      |         | 172                                  | 0     |         | 80  | 0     |         | 79                                                           | 0      |         | 366            | 0     |         |
|                                  | Yes                                             | 34                | 0.007  | 0.986   |                   |      |         | 128                                  | -0.5  | 0.825   | 53  | 0.18  | 0.682   | 136                                                          | 0.01   | 0.999   | 298            | 0.1   | 0.573   |
| Proximity to agricultural fields | >1000 m                                         |                   |        |         |                   |      |         |                                      |       |         |     |       |         |                                                              |        |         |                |       |         |
|                                  | Between 150 and 1000 m                          | all same category |        |         |                   |      |         | All same category for available data |       |         |     |       |         |                                                              |        |         | 149            | 0     |         |
|                                  | < 150 m                                         |                   |        |         |                   |      |         |                                      |       |         |     |       |         | All same category for for available data (those who answered |        |         | 166            | 1.55  | <0.001  |
| Income by household**            | Low                                             | 12                | 0      |         |                   |      |         |                                      |       |         | 1   | 0     |         | 10                                                           | 0      |         |                |       |         |
|                                  | Medium                                          | 72                | 0.34   | 0.62    |                   |      |         |                                      |       |         | 14  | 17.69 | 1       | 78                                                           | 0.26   | 0.823   | 22             | 0     |         |
|                                  | High                                            | 48                | 0.46   | 0.506   | All same category |      |         |                                      |       |         | 116 | 19.25 | 1       | 121                                                          | 1.16   | 0.326   | 150            | 0.25  | 0.619   |
|                                  | Don't know or don't want to share               |                   |        |         |                   |      |         |                                      |       |         | 1   | -0.71 | 1       | 14                                                           | 18.90  | 0.999   | 169            | 0.38  | 0.45    |
| Highest education household      | ISCED 0-2                                       | 10                | 0      |         |                   |      |         | 15                                   | 0     |         | 1   | 0     |         | 10                                                           | 0      |         | 14             | 0.9   | 0.331   |
|                                  | ISCED 3-4                                       | 39                | 0.4    | 0.6     |                   |      |         | 116                                  | 0.18  | 0.754   | 19  | 20.63 | 1       | 76                                                           | 1.42   | 0.256   | 35             | 0     |         |
|                                  | ISCED≥5                                         | 100               | 0.19   | 0.789   |                   |      |         | 169                                  | 0.19  | 0.731   | 111 | 20.33 | 1       | 136                                                          | 1.34   | 0.253   | 231            | 0.11  | 0.783   |

p values mentioned are pairwise p values except for age which was not categorical but continuous

Covariates forced into the model were creatinine, BMI, matrix (morning & spot urine)

OR= exp (Beta)

\*: LOQ was set at 0.1 µg/L. Study 3XG was not taken into account here seeing the LOQ in that study was already 0.2 µg/L.

\*\*: Country specific

Note that if a trend was observed in the data and the distribution of participants was unequal over different categories or the number of participants was small for certain categories, a combination of categories was taken. Here results are displayed as observed in the original questionnaire.

Not all studied exposure determinants are listed in the table above; Most relevant were chosen.
